# Supplementary material
Source: ML conference proceedings conference paper supplement (https://openreview.net/forum?id=mvbr8A_eY2n)
Supplement: supplementary_material [file attachment]

## A Auxiliary Proofs

### A.1 Proof of Theorem 1

*Proof.* Using Fenchel-Rockafellar's duality theorem, the dual of (7) can be written as

$$\begin{aligned} & \max_{f, g, \gamma \geq 0} \int_{\mathcal{X}} f(x) d\alpha(x) + g^\top \beta - \sum_{j, k, j \neq k} \gamma_{jk} \lambda_j & (22) \\ \text{s.t.} & \left( 1 + \sum_{k \neq j} \gamma_{jk} \right) c(x, j) - \sum_{k \neq j} \gamma_{kj} c(x, k) \frac{\beta_k}{\beta_j} \\ & - f(x) - g_j \geq 0 \quad \forall x \in \mathcal{X}, y_j \in \mathcal{Y} \end{aligned}$$

Fixing  $g \in \mathbb{R}^n$  and  $\gamma \in \mathbb{R}^{n(n-1)}$ , we can check using first order conditions that the optimal  $f(x)$  has the closed form expression:

$$\min_{j \in [n]} \bar{g}_{\gamma, c}(x, y_j) := \left( 1 + \sum_{k \neq j} \gamma_{jk} \right) c(x, j) - \sum_{k \neq j} \gamma_{kj} c(x, k) \frac{\beta_k}{\beta_j} - g_j$$

Using this, the infinite dimensional optimization problem in (22) can be transformed to a finite dimensional optimization problem:

$$\max_{g, \gamma \geq 0} \mathcal{E}(g, \gamma) := \int_{\mathcal{X}} \min_{j \in [n]} \bar{g}_{\gamma, c}(x, y_j) d\alpha(x) + g^\top \beta - \sum_{j, k, j \neq k} \gamma_{jk} \lambda_j \quad (23)$$

Alternatively, we can adapt the Laguerre cell notation in (2) to (23):

$$\mathcal{E}(g, \gamma) = \sum_{i \in [n]} \int_{\mathbb{L}_{y_i}(g, \gamma)} \bar{g}_{\gamma, c}(x, y_i) d\alpha(x) + g^\top \beta - \sum_{j, k, j \neq k} \gamma_{jk} \lambda_j$$

where  $\mathbb{L}_{y_i}(g, \gamma) = \left\{ x \in \mathcal{X} : y_i = \arg \min_{y_j} \bar{g}_{\gamma, c}(x, y_j) \right\}$ . □

### A.2 Proof of Theorem 2

*Proof.* We prove the result via uniform convergence:

$$\begin{aligned} & \mathcal{E}(g^*, \gamma^*) - \mathcal{E}(\hat{g}_S, \hat{\gamma}_S) \\ &= \mathcal{E}(g^*, \gamma^*) - \mathcal{E}_S(\hat{g}_S, \hat{\gamma}_S) + \mathcal{E}_S(\hat{g}_S, \hat{\gamma}_S) - \mathcal{E}(\hat{g}_S, \hat{\gamma}_S) \\ &\leq \mathcal{E}(g^*, \gamma^*) - \mathcal{E}_S(g^*, \gamma^*) + \mathcal{E}_S(\hat{g}_S, \hat{\gamma}_S) - \mathcal{E}(\hat{g}_S, \hat{\gamma}_S) \\ &\leq \sup_{g, \gamma} (\mathcal{E}(g, \gamma) - \mathcal{E}_S(g, \gamma)) + \sup_{g, \gamma} (\mathcal{E}_S(g, \gamma) - \mathcal{E}(g, \gamma)) \\ &\leq 2 \sup_{g, \gamma} |\mathcal{E}(g, \gamma) - \mathcal{E}_S(g, \gamma)| \end{aligned} \quad (24)$$

Clearly, it suffices to show that  $\mathcal{E}_S(\cdot)$  converges uniformly to  $\mathcal{E}(\cdot)$ . For a given  $g, \gamma$ , the dual objective function and its' empirical version can be written as

$$\mathcal{E}(g, \gamma) = \mathbb{E}_\alpha[f(X)], \quad \mathcal{E}_S(g, \gamma) = \frac{1}{m} \sum_{t=1}^m f(X^t).$$

Then we can rewrite the supremum in (24) as:

$$\sup_{g, \gamma} |\mathcal{E}(g, \gamma) - \mathcal{E}_S(g, \gamma)| = \sup_{f \in F} \left| \mathbb{E}_\alpha[f(X)] - \frac{1}{m} \sum_{X \in S} f(X) \right| \quad (25)$$

Since  $|f(X)| \leq (R\bar{x} + R)$  for all  $f \in F, X \in \mathcal{X}$ , it follows from Theorem 26.5 in [26] that with probability  $1 - \delta$ ,

$$\sup_{f \in F} \mathbb{E}_\alpha[f(X)] - \frac{1}{m} \sum_{X \in S} f(X) \leq 2\mathbb{E}_S [\text{Rad}_m(F \circ S)] + (R\bar{x} + R) \sqrt{\frac{2 \log(2/\delta)}{m}} \quad (26)$$

and the same also holds by replacing  $F$  with  $-F$ . Here

$$\text{Rad}_m(F \circ S) := \mathbb{E}_\sigma \left[ \frac{1}{m} \sup_f \sum_{j=1}^m \sigma_j f(X_j) \right]$$

is the standard definition of Rademacher complexity of the set  $F \circ S$ . Since  $\sigma_i$  are *i.i.d.* Rademacher random variables, it is easy to see that  $\text{Rad}_m(F \circ S) = \text{Rad}_m(-F \circ S)$ . Therefore we can use a union bound to obtain that with probability  $1 - \delta$ ,

$$\sup_{f \in F} \left| \mathbb{E}_\alpha[f(X)] - \frac{1}{m} \sum_{X \in S} f(X) \right| \leq 2\mathbb{E}_S [\text{Rad}_m(F \circ S)] + (R\bar{x} + R) \sqrt{\frac{2 \log(4/\delta)}{m}} \quad (27)$$

It remains to bound the Rademacher complexity of the  $F \circ S$ . To do so, we use tools from learning theory, and give the following bound on the fat-shattering dimension ([8]) of the hypothesis class  $F$ .

**Lemma 1.** Under Assumption 1,  $F$  has  $\zeta$ -fat-shattering dimension of at most  $\frac{c_0(R\bar{x}+R)^2}{\zeta^2} n \log(n)$ , where  $c_0$  is some universal constant.

The proof of Lemma 1 can be found in the Appendix. The above bound on the fat-shattering dimension can be used to bound the covering number (see Definition 27.1 of [26]) of  $F \circ S$ . Theorem 1 from [22] states that

$$\mathcal{N}(\delta, F, \|\cdot\|_2) \leq \left( \frac{2B}{\delta} \right)^{c_1 \text{fat}_{c_2 \delta}(F)} \quad (28)$$

where  $B$  is a uniform bound on the absolute value of any  $f \in F$ . Let  $B = (R\bar{x} + R)$ , we have that

$$\begin{aligned} & \text{Rad}_m(F \circ S) \\ & \leq \inf_{\delta' > 0} \left\{ 4\delta' + 12 \int_{\delta'}^B \sqrt{\frac{\log \mathcal{N}(\delta, F, \|\cdot\|_2)}{m}} d\delta \right\} \\ & \leq \inf_{\delta' > 0} \left\{ 4\delta' + 12 \frac{\sqrt{c_1 c_0}}{c_2} B \sqrt{\frac{n \log n}{m}} \int_{\delta'}^B \sqrt{\log \left( \frac{2B}{\delta} \right)} d\delta \right\} \\ & = c' \sqrt{\frac{n \log n (\log m)^3}{m}} \end{aligned}$$

Where we used Dudley's chaining integral [28, 16], Lemma 1 and (28), and setting  $\delta' = \frac{1}{\sqrt{m}}$  respectively. Plugging the above back to (27) and (24), we see that with probability  $1 - \delta$ ,

$$\mathcal{E}(g^*, \gamma^*) - \mathcal{E}(\hat{g}_S, \hat{\gamma}_S) \leq c' \left( \sqrt{\frac{n \log n (\log m)^3}{m}} + \sqrt{\frac{1 \log \frac{1}{\delta}}{m}} \right).$$

Conversely, ignoring the log terms,  $m$  needs to be at most on the order of  $\tilde{O}\left(\frac{n}{\epsilon^2}\right)$  in order for  $\mathcal{E}(g^*, \gamma^*) - \mathcal{E}(\hat{g}_S, \hat{\gamma}_S)$  to be bounded by  $\epsilon$  with high probability. □

**Proof of Lemma 1**

*Proof.* Theorem 3 in [20] shows that  $\text{fat}_\zeta(F_{\min}) \leq \frac{c_0(R\bar{x}+R)^2}{\zeta^2} n \log n$ . Since the shattering dimension is monotone in the size of the set, we are done. □

### A.3 Experimental Setup

For the artificial data, the value utility vectors are generated from  $X = [1, 0.7] - Z \begin{bmatrix} 0.2, & 0 \\ 0.8, & 0.4 \end{bmatrix}$  where  $Z \sim Unif(0, 1) \times Unif(0, 1)$ . For finding the optimal allocation policy on the artificial data, we used Algorithm 1 with  $T = 2 \cdot 10^5$ . For simulator data, we used  $T = 2.5 \cdot 10^6$ . To generate Figure 2 we sampled 6000 points from the distribution and plotted them, colored by the allocation. For Figure 4 for each  $m$  we ran 16 trials, sampling a different set of  $m$  data points as our training data per trial. All experiments are run on a 2019, 6-core Macbook Pro laptop. The simulator code is open sourced by [21] at <https://github.com/duncanmcelfresh/blood-matching-simulations>, and also included in the supplementary material.
